# Supplementary material for: Co-crystals of 9,9′-bianthracene-10,10′-dicarboxylic acid with linear bidentate basic ligand molecules: synthesis, crystal structure, and properties based on the layer structure exfoliated by water
Source: Royal Society of Chemistry journal article supplement (doi:10.1039/c9ce01460h), 2019-11-20
Supplement: c9ce01460h1.pdf [file c9ce01460h1.pdf]

Electronic Supplementary information

**Co-crystals of 9,9' -bianthracene-10,10' -dicarboxylic acid with linear bidentate basic ligand molecules: synthesis, crystal structure, and properties based on the layer structure exfoliated by water**

Misaki Okayasu, Shoko Kikkawa, Hidemasa Hikawa and Isao Azumaya\*

Faculty of Pharmaceutical Sciences, Toho University, 2-2-1 Miyama, Funabashi, Chiba 274-8510, Japan  
E-mail: isao.azumaya@phar.toho-u.ac.jp

Fig S1 <sup>1</sup>H NMR spectra for compound **1**

Fig S2 <sup>13</sup>C NMR spectra for compound **1**

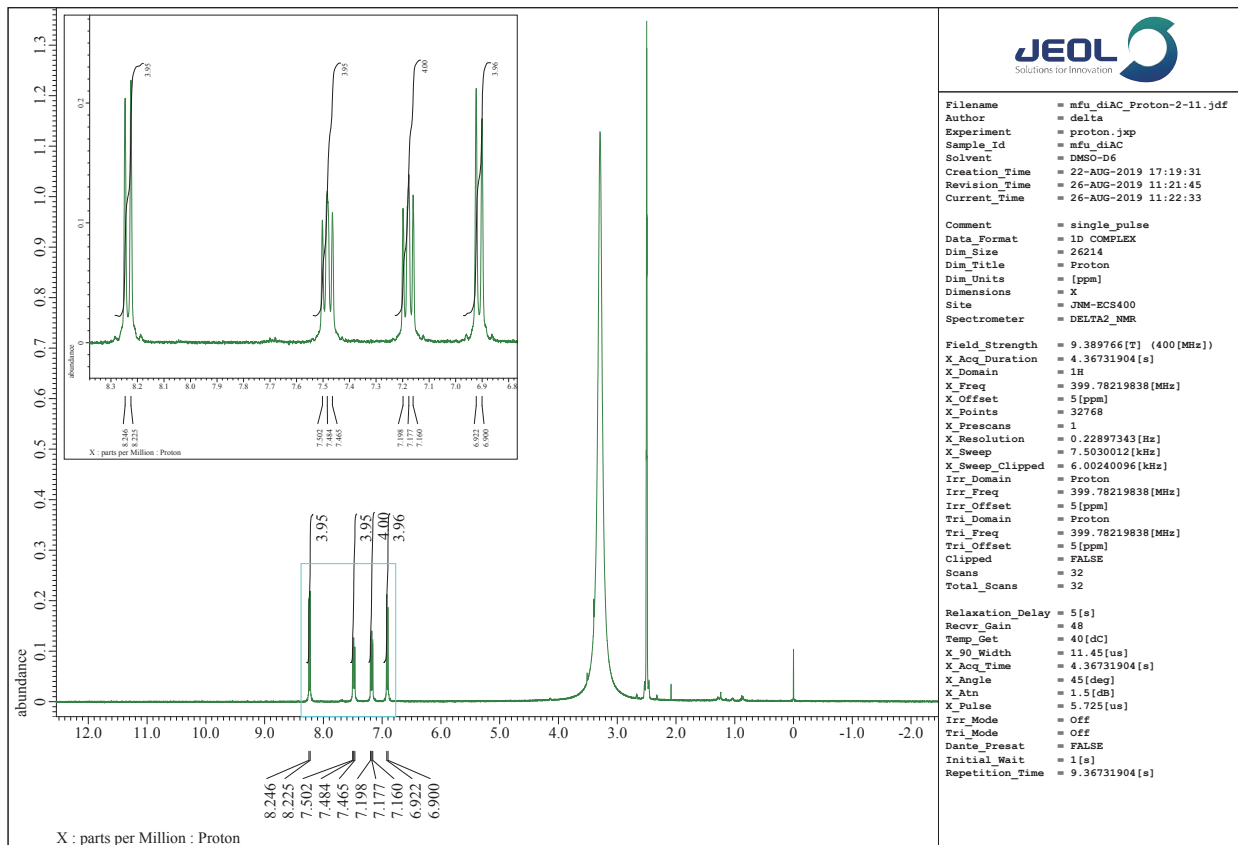

Fig S1 <sup>1</sup>H NMR spectra for compound 1

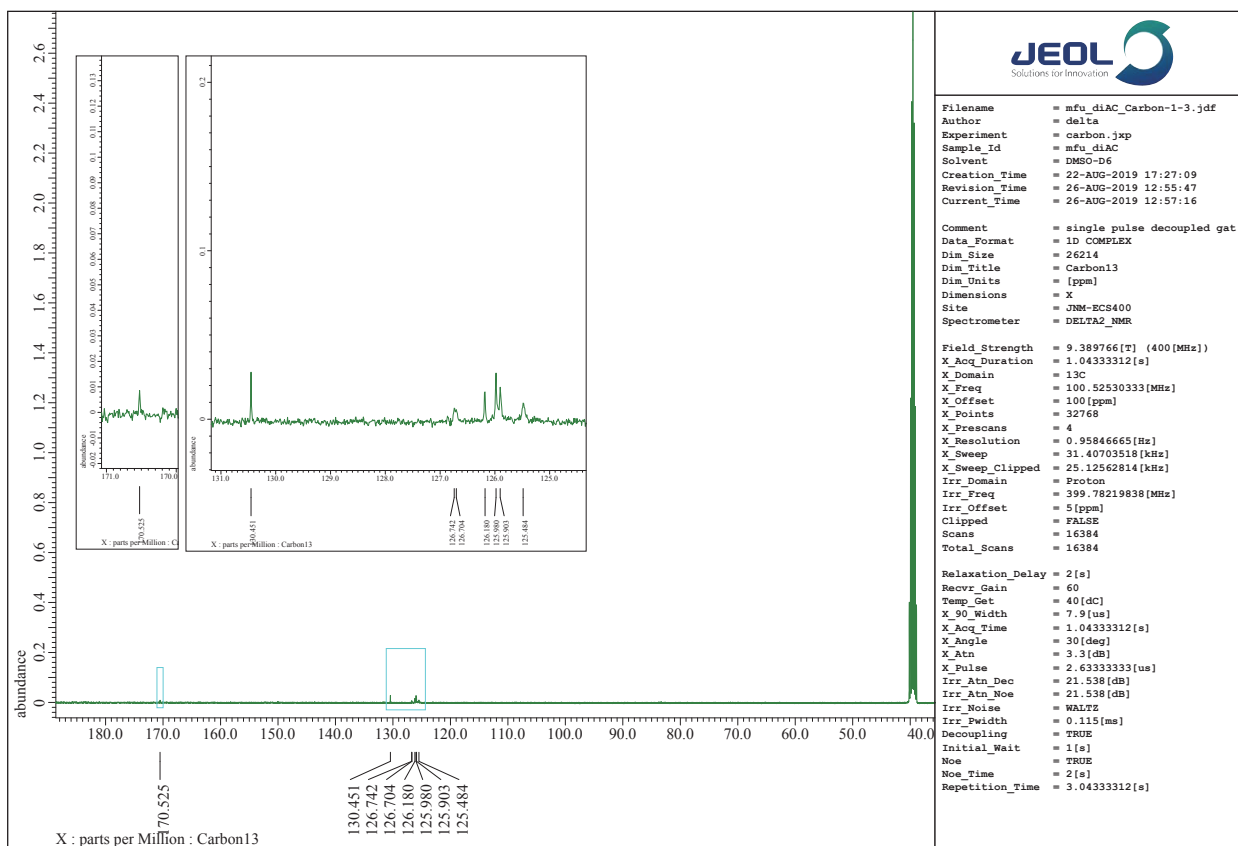

Fig S2 <sup>13</sup>C NMR spectra for compound 1
